# Supplementary figures and images for: Self-assembly of convex particles on spherocylindrical surfaces
Source: Royal Society of Chemistry journal article supplement (doi:10.1039/c8sm00129d), 2018-01-01

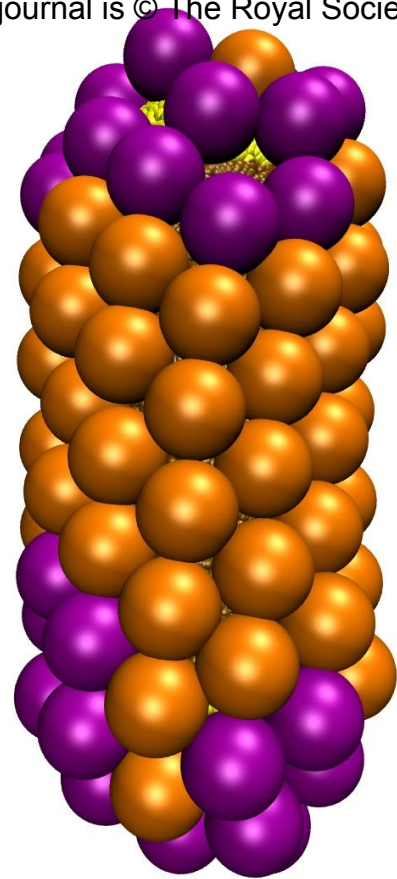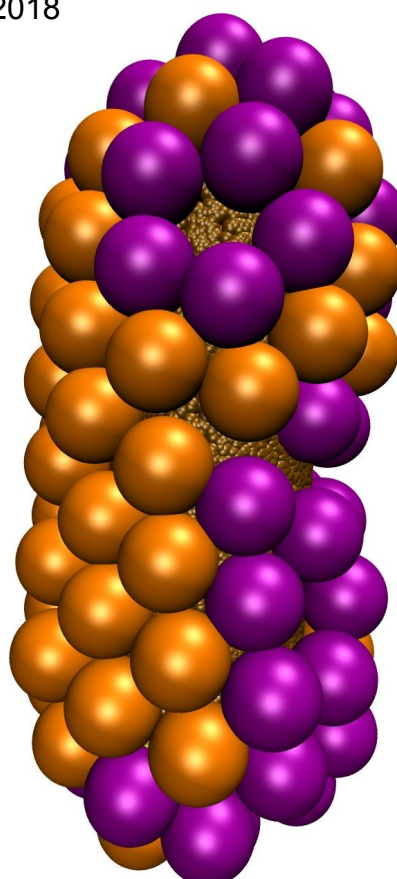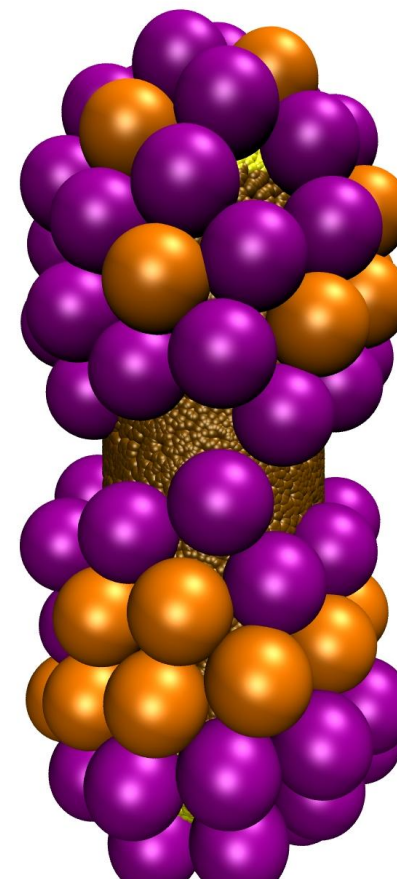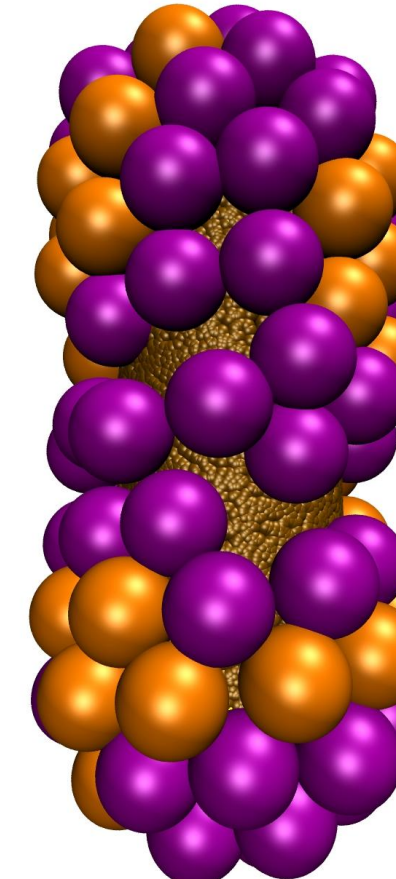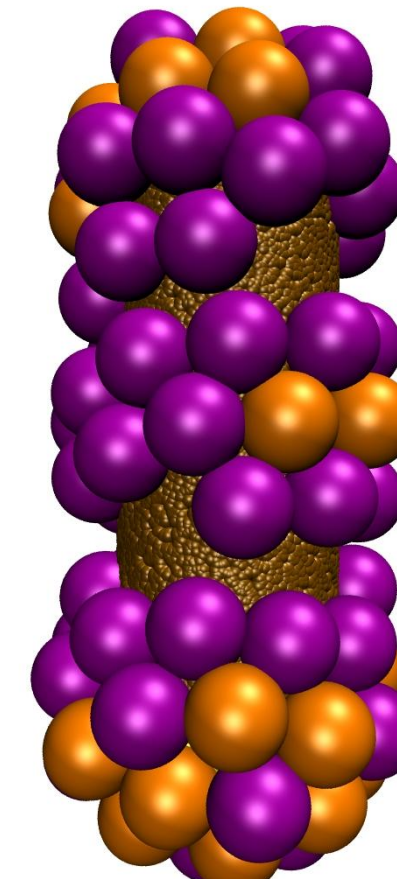

 complete

 partial 2

 incomplete 2

 partial 3

 incomplete 3

$R_{\text{cone}} = 8$

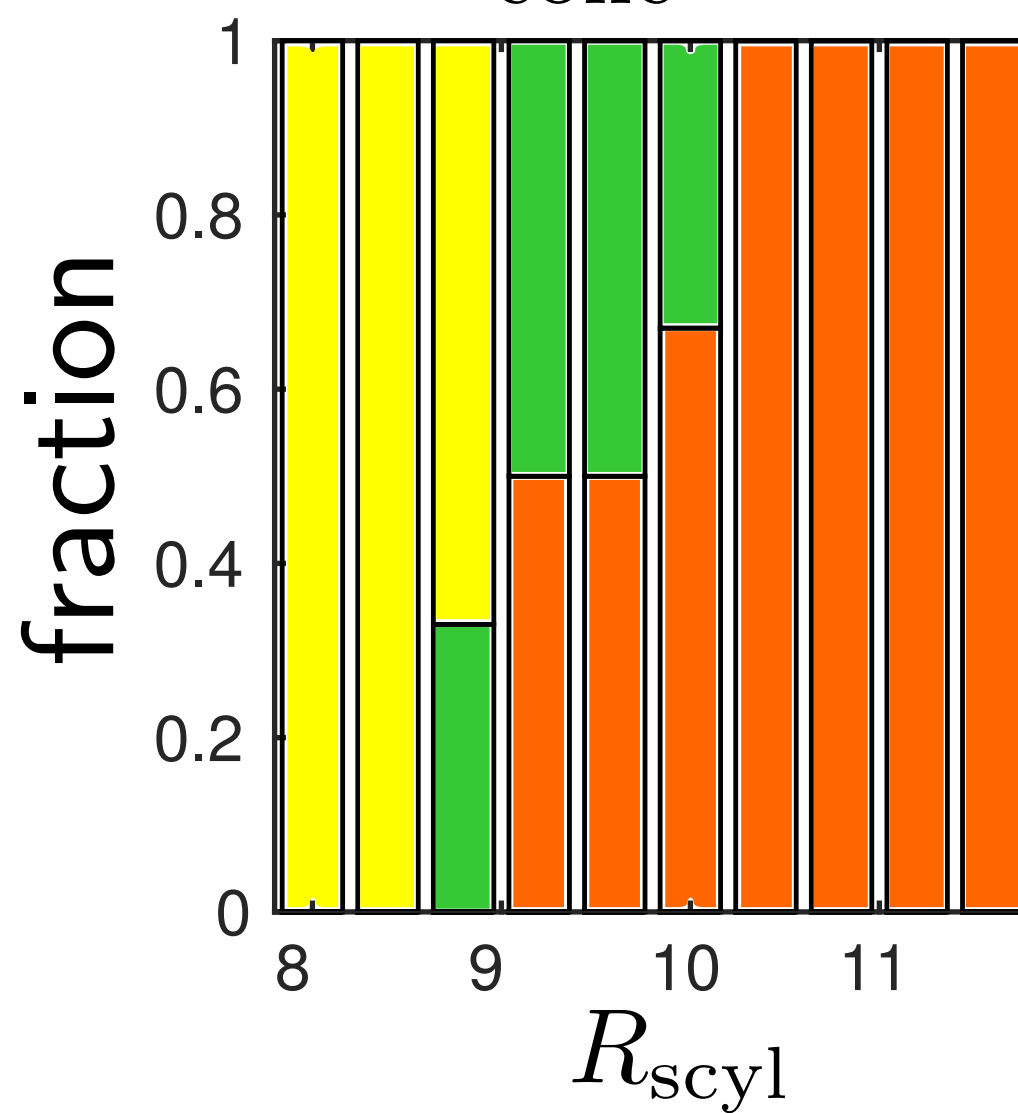

$R_{\text{cone}} = 11$

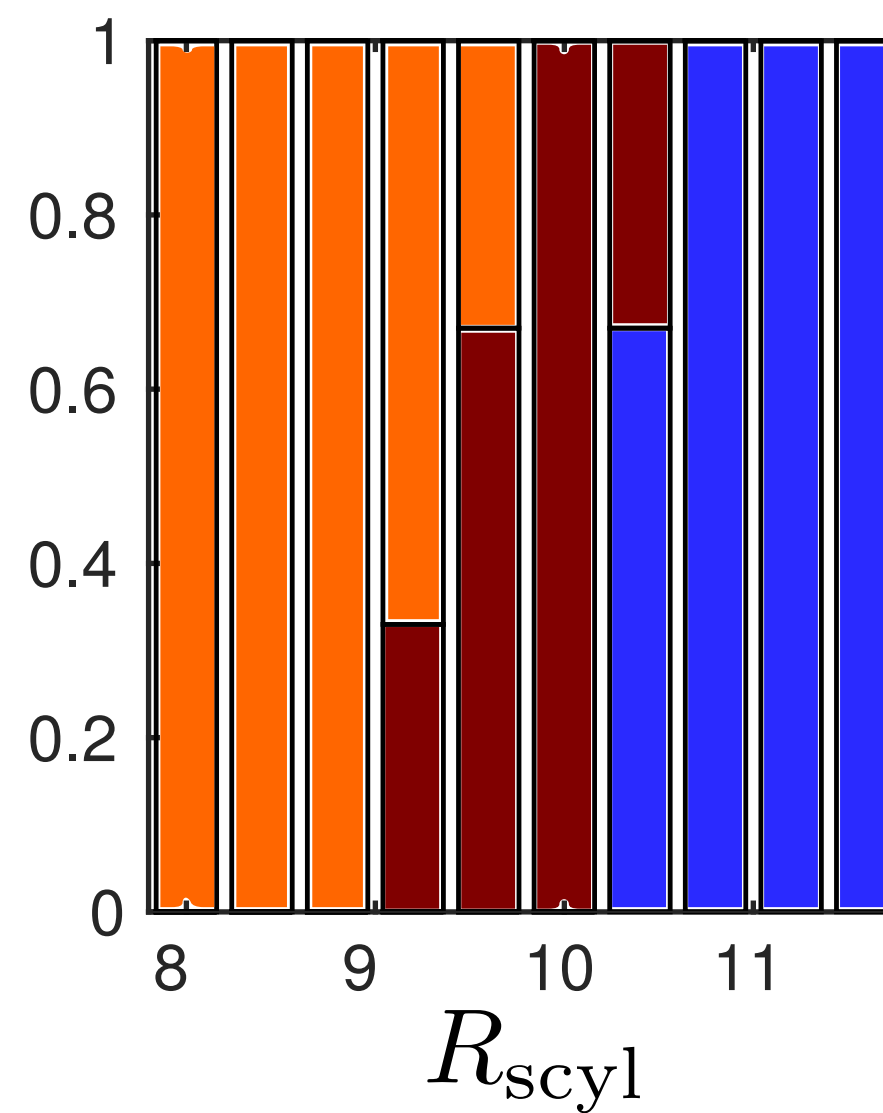

$R_{\text{cone}} = 14$

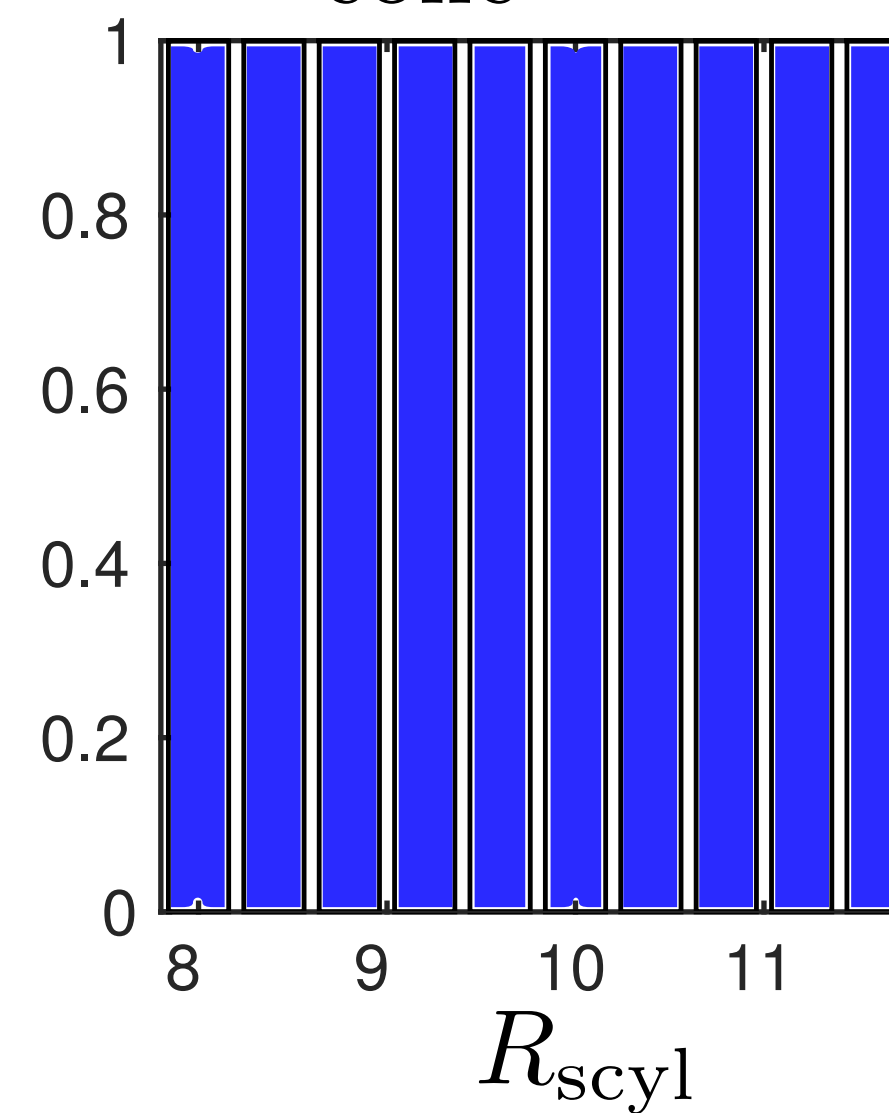

Supplement: c8sm00129d1.pdf [file c8sm00129d1.pdf]
